# Supplementary material for: Proteomics Analysis Reveals Distinct Corona Composition on Magnetic Nanoparticles with Different Surface Coatings: Implications for Interactions with Primary Human Macrophages
Source: PLoS One. 2015 Oct 7;10(10):e0129008. doi: 10.1371/journal.pone.0129008 (PMC4596693; doi:10.1371/journal.pone.0129008)
Supplement: S4 Table — Spectral counts (PSMs) were converted to Z-scores in a row-wise manner (columns starting with PSMz), as described in Materials and Methods. Clusters are numbered 1–5 (Cluster.pam). Data were plotted as a heatmap (Fig 4). (XLSX) [file pone.0129008.s010.xlsx]

## Sheet: S4_Table
# S4_Table. Z-score transformed spectral count values for cluster analysis of nanoparticle coronas and plasma
#
UNIPROT	Accession	Description	AAs	MW.kDa.	calc.pI	ENTREZID	SYMBOL	GENENAME	Names	csnp.plasma.wash	nmag.plasma.wash	Cluster.pam	CSNP1.Z	CSNP2.Z	CSNP3.Z	Nmag1.Z	Nmag2.Z	Nmag3.Z	plasma1.Z	plasma2.Z
P01042	P01042-2 /// P01042	Isoform LMW of Kininogen-1 OS=Homo sapiens GN=KNG1 - [KNG1_HUMAN] /// Kininogen-1 OS=Homo sapiens GN=KNG1 PE=1 SV=2 - [KNG1_HUMAN]	427 /// 644	47.9 /// 71.9	6.65 /// 6.81	3827	KNG1	kininogen 1	P01042	0	0	1	0.33117	0.175068	0.0219328	1.0225	0.442504	0.990651	-1.79597	-1.18785
P01617	P01617	Ig kappa chain V-II region TEW OS=Homo sapiens PE=1 SV=1 - [KV204_HUMAN]	113	12.3	6	NA	NA	NA	P01617	0	0	1	0	0	0	0.706029	1.24604	1.01808	0.208729	0.208729
P01871	P01871	Ig mu chain C region OS=Homo sapiens GN=IGHM PE=1 SV=3 - [IGHM_HUMAN]	452	49.3	6.77	NA	NA	NA	P01871	0	1	1	-1.45663	-1.03581	-0.728131	1.2275	0.916453	0.948461	0.16587	-0.0377171
P02775	P02775	Platelet basic protein OS=Homo sapiens GN=PPBP PE=1 SV=3 - [CXCL7_HUMAN]	128	13.9	8.79	5473	PPBP	pro-platelet basic protein (chemokine (C-X-C motif) ligand 7)	P02775	0	0	1	-0.341884	-0.341884	-0.52536	0.863984	1.14891	1.09695	-0.109509	-1.79122
P02788	P02788	Lactotransferrin OS=Homo sapiens GN=LTF PE=1 SV=6 - [TRFL_HUMAN]	710	78.1	8.12	4057	LTF	lactotransferrin	P02788	0	0	1	0.18104	0.266893	0.226081	0.816518	0.855138	0.770067	0	0
P03952	P03952	Plasma kallikrein OS=Homo sapiens GN=KLKB1 PE=1 SV=1 - [KLKB1_HUMAN]	638	71.3	8.22	3818	KLKB1	kallikrein B, plasma (Fletcher factor) 1	P03952	0	0	1	-0.0311067	-0.0311067	-0.0311067	0.903237	0.975782	1.02817	0	-1.08057
P05106	P05106-2 /// P05106	Isoform Beta-3B of Integrin beta-3 OS=Homo sapiens GN=ITGB3 - [ITB3_HUMAN] /// Integrin beta-3 OS=Homo sapiens GN=ITGB3 PE=1 SV=2 - [ITB3_HUMAN]	780 /// 788	86.1 /// 87	5.27 /// 5.24	3690	ITGB3	integrin, beta 3 (platelet glycoprotein IIIa, antigen CD61)	P05106	0	0	1	0	0	0.0624908	1.16074	1.16074	1.11439	0	0
P08514	P08514-3 /// P08514-2	Isoform 3 of Integrin alpha-IIb OS=Homo sapiens GN=ITGA2B - [ITA2B_HUMAN] /// Isoform 2 of Integrin alpha-IIb OS=Homo sapiens GN=ITGA2B - [ITA2B_HUMAN]	953 /// 1005	103.2 /// 109.5	5.67 /// 5.33	3674	ITGA2B	integrin, alpha 2b (platelet glycoprotein IIb of IIb/IIIa complex, antigen CD41)	P08514	0	1	1	0.174025	0.189011	0.257058	0.747248	0.90058	0.832315	0	0
P08567	P08567	Pleckstrin OS=Homo sapiens GN=PLEK PE=1 SV=3 - [PLEK_HUMAN]	350	40.1	8.28	5341	PLEK	pleckstrin	P08567	0	0	1	0.318007	0.318007	0.318007	0.492599	1.05597	0.638044	0	0
P13224	P13224	Platelet glycoprotein Ib beta chain OS=Homo sapiens GN=GP1BB PE=1 SV=1 - [GP1BB_HUMAN]	206	21.7	9.31	2812	GP1BB	glycoprotein Ib (platelet), beta polypeptide	P13224	0	0	1	0.0838656	0.0838656	0.0838656	0.828732	1.07449	0.828732	0	0
P14770	P14770	Platelet glycoprotein IX OS=Homo sapiens GN=GP9 PE=1 SV=3 - [GPIX_HUMAN]	177	19	6.34	2815	GP9	glycoprotein IX (platelet)	P14770	0	0	1	0.228396	0	0	1.35003	1.08111	0.894089	0	0
P18206	P18206-2	Isoform 1 of Vinculin OS=Homo sapiens GN=VCL - [VINC_HUMAN]	1066	116.6	6.09	7414	VCL	vinculin	P18206	0	0	1	-0.330219	-0.613913	0.110438	0.993455	1.14183	1.12529	0	0
P21333	P21333-2	Isoform 2 of Filamin-A OS=Homo sapiens GN=FLNA - [FLNA_HUMAN]	2639	279.8	6.05	2316	FLNA	filamin A, alpha	P21333	0	1	1	0.0119199	-0.193567	0.0733491	0.975656	1.02922	0.948273	0	0
P60709	P60709	Actin, cytoplasmic 1 OS=Homo sapiens GN=ACTB PE=1 SV=1 - [ACTB_HUMAN]	375	41.7	5.48	60	ACTB	actin, beta	P60709	0	1	1	0.0972541	0.151857	0.201606	0.824294	0.937349	0.757869	0	-1.04736
P67936	P67936	Tropomyosin alpha-4 chain OS=Homo sapiens GN=TPM4 PE=1 SV=3 - [TPM4_HUMAN]	248	28.5	4.69	7171	TPM4	tropomyosin 4	P67936	0	0	1	0	0	0	0.976327	1.28971	1.33688	0	0
P68871	P68871	Hemoglobin subunit beta OS=Homo sapiens GN=HBB PE=1 SV=2 - [HBB_HUMAN]	147	16	7.28	3043	HBB	hemoglobin, beta	P68871	0	0	1	0	0	0	1.24026	1.24026	1.1406	0	0
Q86UX7	Q86UX7-2	Isoform 2 of Fermitin family homolog 3 OS=Homo sapiens GN=FERMT3 - [URP2_HUMAN]	663	75.4	6.77	83706	FERMT3	fermitin family member 3	Q86UX7	0	0	1	0	0	0	1.13531	1.23195	1.25354	0	0
Q8WUI4	Q8WUI4-10	Isoform 10 of Histone deacetylase 7 OS=Homo sapiens GN=HDAC7 - [HDAC7_HUMAN]	614	66.1	6.57	51564	HDAC7	histone deacetylase 7	Q8WUI4	0	0	1	0	0	0	1.20761	1.20761	1.20761	0	0
Q96GX5	Q96GX5-2	Isoform 2 of Serine/threonine-protein kinase greatwall OS=Homo sapiens GN=MASTL - [GWL_HUMAN]	840	92.8	6.13	84930	MASTL	microtubule associated serine/threonine kinase-like	Q96GX5	0	0	1	-0.229287	0	0.640834	0.440894	1.14814	1.237	0	0
Q9Y490	Q9Y490	Talin-1 OS=Homo sapiens GN=TLN1 PE=1 SV=3 - [TLN1_HUMAN]	2541	269.6	6.07	7094	TLN1	talin 1	Q9Y490	0	0	1	-0.0329608	0.0678139	0.218018	0.925841	0.941892	0.864427	0	0
P01024	P01024	Complement C3 OS=Homo sapiens GN=C3 PE=1 SV=2 - [CO3_HUMAN]	1663	187	6.4	718	C3	complement component 3	P01024	0	0	2	1.34333	1.06607	1.08148	-0.988176	-1.06073	-0.252704	-0.68593	-0.503347
P02647	P02647	Apolipoprotein A-I OS=Homo sapiens GN=APOA1 PE=1 SV=1 - [APOA1_HUMAN]	267	30.8	5.76	335	APOA1	apolipoprotein A-I	P02647	0	0	2	0.672907	0.585922	0.585922	-1.10926	-1.24183	-1.24183	0.968388	0.779783
P02649	P02649	Apolipoprotein E OS=Homo sapiens GN=APOE PE=1 SV=1 - [APOE_HUMAN]	317	36.1	5.73	348	APOE	apolipoprotein E	P02649	0	1	2	1.10954	1.10954	1.05444	-0.706317	-0.0845242	-0.238798	-0.706317	-1.53756
P02671	P02671-2	Isoform 2 of Fibrinogen alpha chain OS=Homo sapiens GN=FGA - [FIBA_HUMAN]	644	69.7	8.06	2243	FGA	fibrinogen alpha chain	P02671	0	0	2	1.16379	1.06621	1.22535	-0.844865	-1.2019	-0.816365	-0.236426	-0.355803
P02675	P02675	Fibrinogen beta chain OS=Homo sapiens GN=FGB PE=1 SV=2 - [FIBB_HUMAN]	491	55.9	8.27	2244	FGB	fibrinogen beta chain	P02675	0	0	2	1.17087	1.05218	1.23313	-0.606151	-1.25131	-0.606151	-0.173661	-0.818909
P02679	P02679-2	Isoform Gamma-A of Fibrinogen gamma chain OS=Homo sapiens GN=FGG - [FIBG_HUMAN]	437	49.5	6.09	2266	FGG	fibrinogen gamma chain	P02679	0	0	2	1.08294	1.07288	1.19017	-1.12462	-1.12462	-0.792634	0.0146752	-0.318806
P02751	P02751-10 /// P02751-12 /// P02751-4	Isoform 10 of Fibronectin OS=Homo sapiens GN=FN1 - [FINC_HUMAN] /// Isoform 12 of Fibronectin OS=Homo sapiens GN=FN1 - [FINC_HUMAN] /// Isoform 4 of Fibronectin OS=Homo sapiens GN=FN1 - [FINC_HUMAN]	2176 /// 2008 /// 2031	239.5 /// 221.2 /// 222.8	5.88 /// 6.18 /// 5.68	2335	FN1	fibronectin 1	P02751	0	1	2	1.09069	1.14169	1.23907	-0.319145	-0.845239	-0.385741	-1.24421	-0.677117
P02790	P02790	Hemopexin OS=Homo sapiens GN=HPX PE=1 SV=2 - [HEMO_HUMAN]	462	51.6	7.02	3263	HPX	hemopexin	P02790	0	0	2	0.609373	0.609373	0.274832	-0.634507	-0.634507	-1.96295	0.948005	0.790382
P04114	P04114	Apolipoprotein B-100 OS=Homo sapiens GN=APOB PE=1 SV=2 - [APOB_HUMAN]	4563	515.3	7.05	338	APOB	apolipoprotein B	P04114	0	0	2	1.2157	1.11356	1.18762	-0.763801	-1.01904	-0.658063	-0.882849	-0.193126
P0C0L4	P0C0L4	Complement C4-A OS=Homo sapiens GN=C4A PE=1 SV=1 - [CO4A_HUMAN]	1744	192.7	7.08	720 /// 721	C4A /// C4B	complement component 4A (Rodgers blood group) /// complement component 4B (Chido blood group)	P0C0L4	0	0	2	0.987574	1.38959	1.12485	-0.412546	-0.485658	-0.562421	-1.12666	-0.914726
P01023	P01023	Alpha-2-macroglobulin OS=Homo sapiens GN=A2M PE=1 SV=3 - [A2MG_HUMAN]	1474	163.2	6.46	2	A2M	alpha-2-macroglobulin	P01023	0	1	3	-1.22394	-1.35081	-0.91161	1.1221	0.645848	0.834355	0.238204	0.645848
P01620	P01620	Ig kappa chain V-III region SIE OS=Homo sapiens PE=1 SV=1 - [KV302_HUMAN]	109	11.8	8.48	NA	NA	NA	P01620	0	0	3	0	0	0	0.740262	0.701648	0.701648	0.701648	0.776468
P01765	P01765	Ig heavy chain V-III region TIL OS=Homo sapiens PE=1 SV=1 - [HV304_HUMAN]	115	12.3	9.13	NA	NA	NA	P01765	0	0	3	0	0	0	0.670864	0.670864	0.519147	0.942442	0.793543
P01766	P01766	Ig heavy chain V-III region BRO OS=Homo sapiens PE=1 SV=1 - [HV305_HUMAN]	120	13.2	6.57	NA	NA	NA	P01766	0	0	3	0	0	0	0.734674	0.734674	0.734674	0.683608	0.734674
P01834	P01834	Ig kappa chain C region OS=Homo sapiens GN=IGKC PE=1 SV=1 - [IGKC_HUMAN]	106	11.6	5.87	NA	NA	NA	P01834	0	0	3	-1.97202	-0.469565	-0.723424	0.760392	0.87405	0.130115	0.582774	0.817676
P01859	P01859	Ig gamma-2 chain C region OS=Homo sapiens GN=IGHG2 PE=1 SV=2 - [IGHG2_HUMAN]	326	35.9	7.59	NA	NA	NA	P01859	0	1	3	0	0	0	0	0	0	1.72494	1.51008
P01861	P01861	Ig gamma-4 chain C region OS=Homo sapiens GN=IGHG4 PE=1 SV=1 - [IGHG4_HUMAN]	327	35.9	7.36	NA	NA	NA	P01861	0	0	3	0	-0.112153	-0.112153	0.186969	0.186969	0.353922	0.975358	0.799173
P01876	P01876	Ig alpha-1 chain C region OS=Homo sapiens GN=IGHA1 PE=1 SV=2 - [IGHA1_HUMAN]	353	37.6	6.51	NA	NA	NA	P01876	0	1	3	0	0	0	0.640912	0.57149	0.624515	0.978894	0.778994
P04433	P04433	Ig kappa chain V-III region VG (Fragment) OS=Homo sapiens PE=1 SV=1 - [KV309_HUMAN]	115	12.6	4.96	NA	NA	NA	P04433	0	0	3	0	0	0	0	0	0.713423	1.57095	1.24034
P69905	P69905	Hemoglobin subunit alpha OS=Homo sapiens GN=HBA1 PE=1 SV=2 - [HBA_HUMAN]	142	15.2	8.68	3039 /// 3040	HBA1 /// HBA2	hemoglobin, alpha 1 /// hemoglobin, alpha 2	P69905	0	0	3	-0.245018	-1.42356	-1.42356	0.935585	0.301119	0.532453	1.27887	0.0441029
P00738	P00738	Haptoglobin OS=Homo sapiens GN=HP PE=1 SV=1 - [HPT_HUMAN]	406	45.2	6.58	3240	HP	haptoglobin	P00738	0	1	4	-1.03356	-1.03356	-0.734983	-0.116085	0.107735	-0.116085	1.49845	1.42808
P00751	P00751-2 /// P00751	Isoform 2 of Complement factor B OS=Homo sapiens GN=CFB - [CFAB_HUMAN] /// Complement factor B OS=Homo sapiens GN=CFB PE=1 SV=2 - [CFAB_HUMAN]	621 /// 764	68.8 /// 85.5	6.57 /// 7.06	629	CFB	complement factor B	P00751	0	0	4	-0.375818	-0.924794	-0.0122674	-0.924794	-0.924794	0.259973	1.37043	1.53206
P01009	P01009-3 /// P01009-2	Isoform 3 of Alpha-1-antitrypsin OS=Homo sapiens GN=SERPINA1 - [A1AT_HUMAN] /// Isoform 2 of Alpha-1-antitrypsin OS=Homo sapiens GN=SERPINA1 - [A1AT_HUMAN]	306 /// 359	34.7 /// 40.2	5.19 /// 5.47	5265	SERPINA1	serpin peptidase inhibitor, clade A (alpha-1 antiproteinase, antitrypsin), member 1	P01009	0	0	4	-1.51421	-0.695939	-1.01961	0.441402	0.259197	0.520887	1.56687	0.441402
P01857	P01857	Ig gamma-1 chain C region OS=Homo sapiens GN=IGHG1 PE=1 SV=1 - [IGHG1_HUMAN]	330	36.1	8.19	NA	NA	NA	P01857	0	0	4	-0.879994	-0.879994	-0.879994	-0.224528	-0.155977	0.0967006	1.86094	1.06285
P01860	P01860	Ig gamma-3 chain C region OS=Homo sapiens GN=IGHG3 PE=1 SV=2 - [IGHG3_HUMAN]	377	41.3	7.9	NA	NA	NA	P01860	0	0	4	-0.843855	-1.25399	-0.843855	0.345471	-0.0271364	-0.0271364	1.75533	0.895162
P02768	P02768	Serum albumin OS=Homo sapiens GN=ALB PE=1 SV=2 - [ALBU_HUMAN]	609	69.3	6.28	213	ALB	albumin	P02768	1	1	4	-0.454356	-0.829953	-0.90242	-0.33096	-0.385432	-0.221164	1.78885	1.33544
P02787	P02787	Serotransferrin OS=Homo sapiens GN=TF PE=1 SV=3 - [TRFE_HUMAN]	698	77	7.12	7018	TF	transferrin	P02787	1	0	4	-0.577638	-0.786755	-0.955752	-0.293127	-0.338383	-0.162012	1.38398	1.72969
A6NMB1	A6NMB1	Sialic acid-binding Ig-like lectin 16 OS=Homo sapiens GN=SIGLEC16 PE=2 SV=3 - [SIG16_HUMAN]	481	53	9.03	NA	NA	NA	A6NMB1	0	0	5	0	1.8165	1.40413	0	0	0	0	0
P00734	P00734	Prothrombin OS=Homo sapiens GN=F2 PE=1 SV=2 - [THRB_HUMAN]	622	70	5.9	2147	F2	coagulation factor II (thrombin)	P00734	0	0	5	1.04315	1.05464	0.926649	0	0	-0.489602	-0.17938	0.316248
P00747	P00747	Plasminogen OS=Homo sapiens GN=PLG PE=1 SV=2 - [PLMN_HUMAN]	810	90.5	7.24	5340	PLG	plasminogen	P00747	0	0	5	0.985831	0.985831	1.00472	0	0	-0.47155	0.16589	0.082506
P00748	P00748	Coagulation factor XII OS=Homo sapiens GN=F12 PE=1 SV=3 - [FA12_HUMAN]	615	67.7	7.74	2161	F12	coagulation factor XII (Hageman factor)	P00748	0	0	5	1.17207	1.23767	1.21254	0	0	0	0	0
P01877	P01877	Ig alpha-2 chain C region OS=Homo sapiens GN=IGHA2 PE=1 SV=3 - [IGHA2_HUMAN]	340	36.5	6.1	NA	NA	NA	P01877	0	0	5	0.278504	0.543181	0.725202	0	0	0	1.81155	0
P02747	P02747	Complement C1q subcomponent subunit C OS=Homo sapiens GN=C1QC PE=1 SV=3 - [C1QC_HUMAN]	245	25.8	8.41	714	C1QC	complement component 1, q subcomponent, C chain	P02747	0	0	5	0.7935	0.7935	0.7935	0.25216	0.25216	0.25216	0	0
P02776	P02776	Platelet factor 4 OS=Homo sapiens GN=PF4 PE=1 SV=2 - [PLF4_HUMAN]	101	10.8	8.62	5196	PF4	platelet factor 4	P02776	0	0	5	0.526743	0.509622	0.41381	0.589848	0.604442	0.589848	0	0
P03950	P03950	Angiogenin OS=Homo sapiens GN=ANG PE=1 SV=1 - [ANGI_HUMAN]	147	16.5	9.64	283	ANG	angiogenin, ribonuclease, RNase A family, 5	P03950	0	0	5	0.351115	1.07525	0.780009	0.780009	-0.445422	0.351115	0	0
P04004	P04004	Vitronectin OS=Homo sapiens GN=VTN PE=1 SV=1 - [VTNC_HUMAN]	478	54.3	5.8	7448	VTN	vitronectin	P04004	0	0	5	0.908133	1.08789	0.70263	-0.232452	0.174627	0.138734	-0.874335	-1.90522
P04196	P04196	Histidine-rich glycoprotein OS=Homo sapiens GN=HRG PE=1 SV=1 - [HRG_HUMAN]	525	59.5	7.5	3273	HRG	histidine-rich glycoprotein	P04196	0	0	5	0.668606	0.774106	0.668606	0.296568	0.412236	0.329839	-1.87404	-1.27592
P07996	P07996	Thrombospondin-1 OS=Homo sapiens GN=THBS1 PE=1 SV=2 - [TSP1_HUMAN]	1170	129.3	4.94	7057	THBS1	thrombospondin 1	P07996	0	0	5	0.633039	0.600004	0.678646	0.47333	0.426417	0.413928	0	0
P0CG04	P0CG04	Ig lambda-1 chain C regions OS=Homo sapiens GN=IGLC1 PE=1 SV=1 - [LAC1_HUMAN]	106	11.3	7.87	NA	NA	NA	P0CG04	0	0	5	0.747993	0.889867	0.889867	1.18653	0	0	0	0
P10909	P10909-3	Isoform 3 of Clusterin OS=Homo sapiens GN=CLU - [CLUS_HUMAN]	274	32.3	6.65	1191	CLU	clusterin	P10909	0	0	5	0.655135	0.655135	0.655135	0.655135	0.233322	-0.303996	-2.24587	-0.303996
P59665	P59665	Neutrophil defensin 1 OS=Homo sapiens GN=DEFA1 PE=1 SV=1 - [DEF1_HUMAN]	94	10.2	6.99	1667 /// 728358	DEFA1 /// DEFA1B	defensin, alpha 1 /// defensin, alpha 1B	P59665	0	1	5	0.650162	0.650162	0.699607	0.476315	0.407105	0.330207	0	0
Q03591	Q03591	Complement factor H-related protein 1 OS=Homo sapiens GN=CFHR1 PE=1 SV=2 - [FHR1_HUMAN]	330	37.6	7.39	3078	CFHR1	complement factor H-related 1	Q03591	0	0	5	1.21916	1.21916	1.18431	0	0	0	0	0
Q76FK4	Q76FK4-3	Isoform 3 of Nucleolar protein 8 OS=Homo sapiens GN=NOL8 - [NOL8_HUMAN]	1041	117.4	6.92	55035	NOL8	nucleolar protein 8	Q76FK4	0	0	5	1.40729	1.40729	0.727702	0	0	0	0	0
Q9HC10	Q9HC10-2	Isoform 2 of Otoferlin OS=Homo sapiens GN=OTOF - [OTOF_HUMAN]	1230	140.2	6.24	9381	OTOF	otoferlin	Q9HC10	0	0	5	1.40195	0.743309	1.40195	0	0	0	0	0
