# Supplementary material for: Proteomics Analysis Reveals Distinct Corona Composition on Magnetic Nanoparticles with Different Surface Coatings: Implications for Interactions with Primary Human Macrophages
Source: PLoS One. 2015 Oct 7;10(10):e0129008. doi: 10.1371/journal.pone.0129008 (PMC4596693; doi:10.1371/journal.pone.0129008)
Supplement: S7 Table — Abbreviations: KEGG = Kyoto Encyclopedia of Genes and Genomes (http://www.genome.jp/kegg/). C = total number of proteins in the category/pathway, O = observed number of proteins in the category/pathway, E = expected number of proteins in the pathway. R = ratio between the expected and observed number of proteins in the category/pathway, rawP = p-value for enrichment calculated using the hyper geometric method, adjP = multiple testing corrected p-value (Benjamini-Hochberg method). Analysis parameters are recorded at the top of the table. For signature-associated genes, see S9 Table. (XLSX) [file pone.0129008.s013.xlsx]

## Sheet: S7_Table
# S7_Table. KEGG pathway enrichment analysis using the Webgestalt tool for the signatures “Csnp_vs_Plasma_UP_exclude_nMag_UP” and "NMag_vs_Plasma_UP_exclude_Csnp_UP"
#
ProteinList
Csnp_vs_Plasma_UP_exclude_nMag_UP	User data and parameters: User data: csnp_vs_plasma_exclude_nmag_up131203.txt, Organism: hsapiens, Id Type: uniprot_swissprot_accession, Ref Set: corona_bkg.txt, Significance Level: .05, Statistics Test: Hypergeometric, MTC: BH, Minimum: 3
Csnp_vs_Plasma_UP_exclude_nMag_UP	The results for the enriched KEGG pathways are listed in this table. For each pathway, the first row lists its KEGG pathway
Csnp_vs_Plasma_UP_exclude_nMag_UP	name, and corresponding KEGG ID. The second row lists
Csnp_vs_Plasma_UP_exclude_nMag_UP	number of reference genes in the category (C), number of genes in the gene set and also in the category (O), expected number in the
Csnp_vs_Plasma_UP_exclude_nMag_UP	category (E), Ratio of enrichment (R), p value from hypergeometric test (rawP), and p value adjusted by the multiple test adjustment (adjP).
Csnp_vs_Plasma_UP_exclude_nMag_UP	Finally, genes in the pathway are listed. For each gene, the table lists the user uploaded ID and value (optional), Entrez ID,
Csnp_vs_Plasma_UP_exclude_nMag_UP	Ensembl Gene Stable ID, Gene symbol, and description.
Csnp_vs_Plasma_UP_exclude_nMag_UP
Csnp_vs_Plasma_UP_exclude_nMag_UP	KEGG pathway	Complement and coagulation cascades	4610
Csnp_vs_Plasma_UP_exclude_nMag_UP	C=28;O=10;E=2.89;R=3.46;rawP=0.0001;adjP=0.0005
Csnp_vs_Plasma_UP_exclude_nMag_UP	P02746	C1QB	complement component 1, q subcomponent, B chain	713	ENSG00000173369
Csnp_vs_Plasma_UP_exclude_nMag_UP	P00734	F2	coagulation factor II (thrombin)	2147	ENSG00000180210
Csnp_vs_Plasma_UP_exclude_nMag_UP	P0C0L4	C4A	complement component 4A (Rodgers blood group)	720	ENSG00000244731
Csnp_vs_Plasma_UP_exclude_nMag_UP	P05546	SERPIND1	serpin peptidase inhibitor, clade D (heparin cofactor), member 1	3053	ENSG00000099937
Csnp_vs_Plasma_UP_exclude_nMag_UP	P02747	C1QC	complement component 1, q subcomponent, C chain	714	ENSG00000159189
Csnp_vs_Plasma_UP_exclude_nMag_UP	P00747	PLG	plasminogen	5340	ENSG00000122194
Csnp_vs_Plasma_UP_exclude_nMag_UP	P02675	FGB	fibrinogen beta chain	2244	ENSG00000171564
Csnp_vs_Plasma_UP_exclude_nMag_UP	P02679	FGG	fibrinogen gamma chain	2266	ENSG00000171557
Csnp_vs_Plasma_UP_exclude_nMag_UP	P00748	F12	coagulation factor XII (Hageman factor)	2161	ENSG00000131187
Csnp_vs_Plasma_UP_exclude_nMag_UP	P02671	FGA	fibrinogen alpha chain	2243	ENSG00000171560
Csnp_vs_Plasma_UP_exclude_nMag_UP
Csnp_vs_Plasma_UP_exclude_nMag_UP	KEGG pathway	Staphylococcus aureus infection	5150
Csnp_vs_Plasma_UP_exclude_nMag_UP	C=11;O=5;E=1.14;R=4.40;rawP=0.0025;adjP=0.0063
Csnp_vs_Plasma_UP_exclude_nMag_UP	P02746	C1QB	complement component 1, q subcomponent, B chain	713	ENSG00000173369
Csnp_vs_Plasma_UP_exclude_nMag_UP	P02679	FGG	fibrinogen gamma chain	2266	ENSG00000171557
Csnp_vs_Plasma_UP_exclude_nMag_UP	P00747	PLG	plasminogen	5340	ENSG00000122194
Csnp_vs_Plasma_UP_exclude_nMag_UP	P0C0L4	C4A	complement component 4A (Rodgers blood group)	720	ENSG00000244731
Csnp_vs_Plasma_UP_exclude_nMag_UP	P02747	C1QC	complement component 1, q subcomponent, C chain	714	ENSG00000159189
NMag_vs_Plasma_UP_exclude_Csnp_UP
NMag_vs_Plasma_UP_exclude_Csnp_UP	User data and parameters: User data: m_nmag_vs_plasma_exclude_csnp_up140224.txt, Organism: hsapiens, Id Type: uniprot_swissprot_accession, Ref Set: corona_bkg.txt, Significance Level: Top10, Statistics Test: Hypergeometric, MTC: BH, Minimum: 3
NMag_vs_Plasma_UP_exclude_Csnp_UP
NMag_vs_Plasma_UP_exclude_Csnp_UP	Finally, genes in the pathway are listed. For each gene, the table lists the user uploaded ID and value (optional), Entrez ID, Ensembl Gene Stable ID, Gene symbol, and description. Ensembl Gene Stable ID and Entrez Gene ID are linked to the Ensembl and Entrez Gene databases, respectively.
NMag_vs_Plasma_UP_exclude_Csnp_UP
NMag_vs_Plasma_UP_exclude_Csnp_UP	Database:KEGG pathway Name:Leukocyte transendothelial migration ID:04670
NMag_vs_Plasma_UP_exclude_Csnp_UP	C=9; O=8; E=2.03; R=3.95; rawP=3.35e-05; adjP=0.0008
NMag_vs_Plasma_UP_exclude_Csnp_UP	UserID	Gene Symbol	Gene Name	EntrezGene	Ensembl
NMag_vs_Plasma_UP_exclude_Csnp_UP	P05556	ITGB1	integrin, beta 1 (fibronectin receptor, beta polypeptide, antigen CD29 includes MDF2, MSK12)	3688	ENSG00000150093
NMag_vs_Plasma_UP_exclude_Csnp_UP	P61224	RAP1B	RAP1B, member of RAS oncogene family	5908	ENSG00000127314
NMag_vs_Plasma_UP_exclude_Csnp_UP	P12814	ACTN1	actinin, alpha 1	87	ENSG00000072110
NMag_vs_Plasma_UP_exclude_Csnp_UP	P60709	ACTB	actin, beta	60	ENSG00000075624
NMag_vs_Plasma_UP_exclude_Csnp_UP	P16284	PECAM1	platelet/endothelial cell adhesion molecule 1	5175	NULL
NMag_vs_Plasma_UP_exclude_Csnp_UP	P04899	GNAI2	guanine nucleotide binding protein (G protein), alpha inhibiting activity polypeptide 2	2771	ENSG00000114353
NMag_vs_Plasma_UP_exclude_Csnp_UP	P18206	VCL	vinculin	7414	ENSG00000035403
NMag_vs_Plasma_UP_exclude_Csnp_UP	P26038	MSN	moesin	4478	ENSG00000147065
NMag_vs_Plasma_UP_exclude_Csnp_UP
NMag_vs_Plasma_UP_exclude_Csnp_UP	Database:KEGG pathway Name:Regulation of actin cytoskeleton ID:04810
NMag_vs_Plasma_UP_exclude_Csnp_UP	C=18; O=11; E=4.05; R=2.71; rawP=0.0003; adjP=0.0037
NMag_vs_Plasma_UP_exclude_Csnp_UP	UserID	Gene Symbol	Gene Name	EntrezGene	Ensembl
NMag_vs_Plasma_UP_exclude_Csnp_UP	P06396	GSN	gelsolin	2934	ENSG00000148180
NMag_vs_Plasma_UP_exclude_Csnp_UP	P07737	PFN1	profilin 1	5216	ENSG00000108518
NMag_vs_Plasma_UP_exclude_Csnp_UP	P05106	ITGB3	integrin, beta 3 (platelet glycoprotein IIIa, antigen CD61)	3690	ENSG00000259207ENSG00000259753
NMag_vs_Plasma_UP_exclude_Csnp_UP	P05556	ITGB1	integrin, beta 1 (fibronectin receptor, beta polypeptide, antigen CD29 includes MDF2, MSK12)	3688	ENSG00000150093
NMag_vs_Plasma_UP_exclude_Csnp_UP	P35579	MYH9	myosin, heavy chain 9, non-muscle	4627	ENSG00000100345
NMag_vs_Plasma_UP_exclude_Csnp_UP	P60709	ACTB	actin, beta	60	ENSG00000075624
NMag_vs_Plasma_UP_exclude_Csnp_UP	P12814	ACTN1	actinin, alpha 1	87	ENSG00000072110
NMag_vs_Plasma_UP_exclude_Csnp_UP	P26038	MSN	moesin	4478	ENSG00000147065
NMag_vs_Plasma_UP_exclude_Csnp_UP	P18206	VCL	vinculin	7414	ENSG00000035403
NMag_vs_Plasma_UP_exclude_Csnp_UP	P08514	ITGA2B	integrin, alpha 2b (platelet glycoprotein IIb of IIb/IIIa complex, antigen CD41)	3674	ENSG00000005961
NMag_vs_Plasma_UP_exclude_Csnp_UP	P23528	CFL1	cofilin 1 (non-muscle)	1072	ENSG00000172757
NMag_vs_Plasma_UP_exclude_Csnp_UP
NMag_vs_Plasma_UP_exclude_Csnp_UP	Database:KEGG pathway Name:Focal adhesion ID:04510
NMag_vs_Plasma_UP_exclude_Csnp_UP	C=19; O=10; E=4.28; R=2.34; rawP=0.0028; adjP=0.0175
NMag_vs_Plasma_UP_exclude_Csnp_UP	UserID	Gene Symbol	Gene Name	EntrezGene	Ensembl
NMag_vs_Plasma_UP_exclude_Csnp_UP	Q9Y490	TLN1	talin 1	7094	ENSG00000137076
NMag_vs_Plasma_UP_exclude_Csnp_UP	P05106	ITGB3	integrin, beta 3 (platelet glycoprotein IIIa, antigen CD61)	3690	ENSG00000259207ENSG00000259753
NMag_vs_Plasma_UP_exclude_Csnp_UP	P05556	ITGB1	integrin, beta 1 (fibronectin receptor, beta polypeptide, antigen CD29 includes MDF2, MSK12)	3688	ENSG00000150093
NMag_vs_Plasma_UP_exclude_Csnp_UP	P61224	RAP1B	RAP1B, member of RAS oncogene family	5908	ENSG00000127314
NMag_vs_Plasma_UP_exclude_Csnp_UP	P60709	ACTB	actin, beta	60	ENSG00000075624
NMag_vs_Plasma_UP_exclude_Csnp_UP	P12814	ACTN1	actinin, alpha 1	87	ENSG00000072110
NMag_vs_Plasma_UP_exclude_Csnp_UP	P21333	FLNA	filamin A, alpha	2316	ENSG00000196924
NMag_vs_Plasma_UP_exclude_Csnp_UP	P18206	VCL	vinculin	7414	ENSG00000035403
NMag_vs_Plasma_UP_exclude_Csnp_UP	P08514	ITGA2B	integrin, alpha 2b (platelet glycoprotein IIb of IIb/IIIa complex, antigen CD41)	3674	ENSG00000005961
NMag_vs_Plasma_UP_exclude_Csnp_UP	P07996	THBS1	thrombospondin 1	7057	ENSG00000137801
NMag_vs_Plasma_UP_exclude_Csnp_UP
NMag_vs_Plasma_UP_exclude_Csnp_UP	Database:KEGG pathway Name:Arrhythmogenic right ventricular cardiomyopathy (ARVC) ID:05412
NMag_vs_Plasma_UP_exclude_Csnp_UP	C=6; O=5; E=1.35; R=3.70; rawP=0.0025; adjP=0.0175
NMag_vs_Plasma_UP_exclude_Csnp_UP	UserID	Gene Symbol	Gene Name	EntrezGene	Ensembl
NMag_vs_Plasma_UP_exclude_Csnp_UP	P60709	ACTB	actin, beta	60	ENSG00000075624
NMag_vs_Plasma_UP_exclude_Csnp_UP	P12814	ACTN1	actinin, alpha 1	87	ENSG00000072110
NMag_vs_Plasma_UP_exclude_Csnp_UP	P05106	ITGB3	integrin, beta 3 (platelet glycoprotein IIIa, antigen CD61)	3690	ENSG00000259207ENSG00000259753
NMag_vs_Plasma_UP_exclude_Csnp_UP	P08514	ITGA2B	integrin, alpha 2b (platelet glycoprotein IIb of IIb/IIIa complex, antigen CD41)	3674	ENSG00000005961
NMag_vs_Plasma_UP_exclude_Csnp_UP	P05556	ITGB1	integrin, beta 1 (fibronectin receptor, beta polypeptide, antigen CD29 includes MDF2, MSK12)	3688	ENSG00000150093
NMag_vs_Plasma_UP_exclude_Csnp_UP
NMag_vs_Plasma_UP_exclude_Csnp_UP	Database:KEGG pathway Name:Dilated cardiomyopathy ID:05414
NMag_vs_Plasma_UP_exclude_Csnp_UP	C=7; O=5; E=1.58; R=3.17; rawP=0.0072; adjP=0.0350
NMag_vs_Plasma_UP_exclude_Csnp_UP	UserID	Gene Symbol	Gene Name	EntrezGene	Ensembl
NMag_vs_Plasma_UP_exclude_Csnp_UP	P60709	ACTB	actin, beta	60	ENSG00000075624
NMag_vs_Plasma_UP_exclude_Csnp_UP	P05106	ITGB3	integrin, beta 3 (platelet glycoprotein IIIa, antigen CD61)	3690	ENSG00000259207ENSG00000259753
NMag_vs_Plasma_UP_exclude_Csnp_UP	P08514	ITGA2B	integrin, alpha 2b (platelet glycoprotein IIb of IIb/IIIa complex, antigen CD41)	3674	ENSG00000005961
NMag_vs_Plasma_UP_exclude_Csnp_UP	P05556	ITGB1	integrin, beta 1 (fibronectin receptor, beta polypeptide, antigen CD29 includes MDF2, MSK12)	3688	ENSG00000150093
NMag_vs_Plasma_UP_exclude_Csnp_UP	P67936	TPM4	tropomyosin 4	7171	ENSG00000167460
NMag_vs_Plasma_UP_exclude_Csnp_UP
NMag_vs_Plasma_UP_exclude_Csnp_UP	Database:KEGG pathway Name:Tight junction ID:04530
NMag_vs_Plasma_UP_exclude_Csnp_UP	C=5; O=4; E=1.13; R=3.55; rawP=0.0098; adjP=0.0350
NMag_vs_Plasma_UP_exclude_Csnp_UP	UserID	Gene Symbol	Gene Name	EntrezGene	Ensembl
NMag_vs_Plasma_UP_exclude_Csnp_UP	P35579	MYH9	myosin, heavy chain 9, non-muscle	4627	ENSG00000100345
NMag_vs_Plasma_UP_exclude_Csnp_UP	P60709	ACTB	actin, beta	60	ENSG00000075624
NMag_vs_Plasma_UP_exclude_Csnp_UP	P12814	ACTN1	actinin, alpha 1	87	ENSG00000072110
NMag_vs_Plasma_UP_exclude_Csnp_UP	P04899	GNAI2	guanine nucleotide binding protein (G protein), alpha inhibiting activity polypeptide 2	2771	ENSG00000114353
NMag_vs_Plasma_UP_exclude_Csnp_UP
NMag_vs_Plasma_UP_exclude_Csnp_UP	Database:KEGG pathway Name:Glycolysis / Gluconeogenesis ID:00010
NMag_vs_Plasma_UP_exclude_Csnp_UP	C=5; O=4; E=1.13; R=3.55; rawP=0.0098; adjP=0.0350
NMag_vs_Plasma_UP_exclude_Csnp_UP	UserID	Gene Symbol	Gene Name	EntrezGene	Ensembl
NMag_vs_Plasma_UP_exclude_Csnp_UP	P14618	PKM	pyruvate kinase, muscle	5315	ENSG00000067225
NMag_vs_Plasma_UP_exclude_Csnp_UP	P06733	ENO1	enolase 1, (alpha)	2023	ENSG00000074800
NMag_vs_Plasma_UP_exclude_Csnp_UP	P04075	ALDOA	aldolase A, fructose-bisphosphate	226	ENSG00000149925
NMag_vs_Plasma_UP_exclude_Csnp_UP	P00338	LDHA	lactate dehydrogenase A	3939	ENSG00000134333
NMag_vs_Plasma_UP_exclude_Csnp_UP
NMag_vs_Plasma_UP_exclude_Csnp_UP	Database:KEGG pathway Name:Hypertrophic cardiomyopathy (HCM) ID:05410
NMag_vs_Plasma_UP_exclude_Csnp_UP	C=8; O=5; E=1.80; R=2.78; rawP=0.0159; adjP=0.0497
NMag_vs_Plasma_UP_exclude_Csnp_UP	UserID	Gene Symbol	Gene Name	EntrezGene	Ensembl
NMag_vs_Plasma_UP_exclude_Csnp_UP	P60709	ACTB	actin, beta	60	ENSG00000075624
NMag_vs_Plasma_UP_exclude_Csnp_UP	P05106	ITGB3	integrin, beta 3 (platelet glycoprotein IIIa, antigen CD61)	3690	ENSG00000259207ENSG00000259753
NMag_vs_Plasma_UP_exclude_Csnp_UP	P08514	ITGA2B	integrin, alpha 2b (platelet glycoprotein IIb of IIb/IIIa complex, antigen CD41)	3674	ENSG00000005961
NMag_vs_Plasma_UP_exclude_Csnp_UP	P05556	ITGB1	integrin, beta 1 (fibronectin receptor, beta polypeptide, antigen CD29 includes MDF2, MSK12)	3688	ENSG00000150093
NMag_vs_Plasma_UP_exclude_Csnp_UP	P67936	TPM4	tropomyosin 4	7171	ENSG00000167460
